# Supplementary material
Source: Springer Nature journal article supplement (https://www.springermedizin.de/resource/supplementary/12950_2013_361_MOESM3_ESM.pdf/9557674)

**A**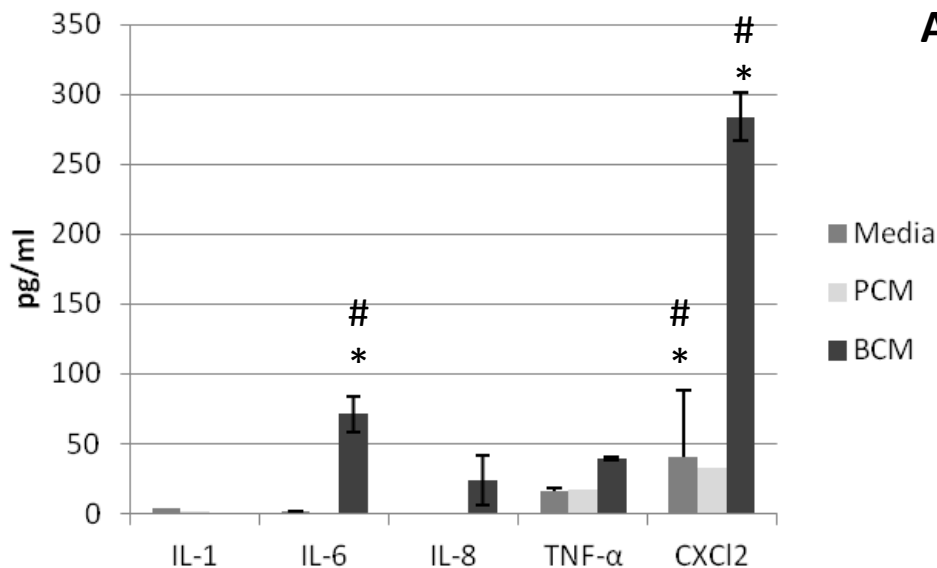**B**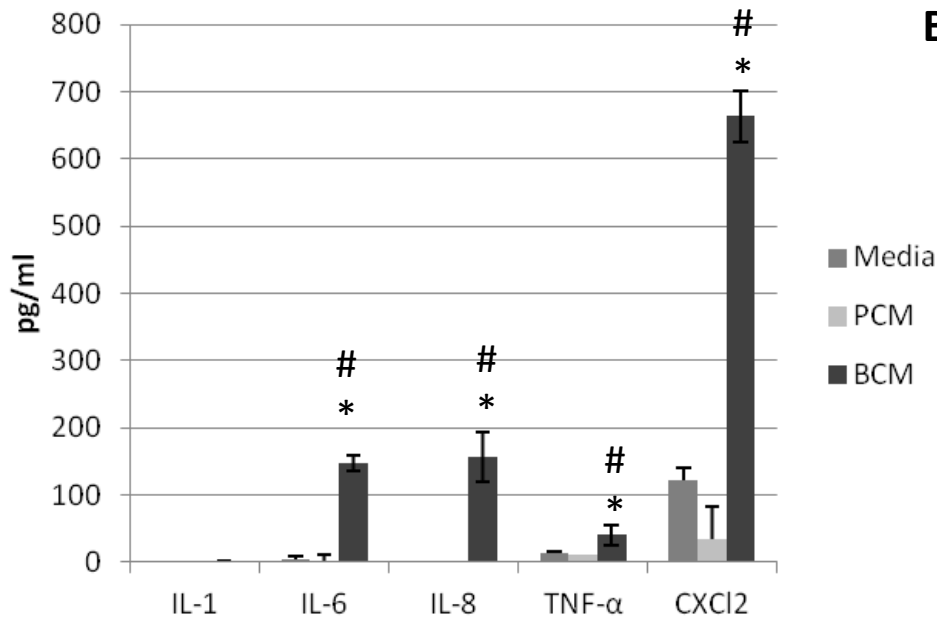

Supplement: MOESM3 [file 9557674]
